# Supplementary material for: Efficacy of implantable haemodynamic monitoring in heart failure across ranges of ejection fraction: a systematic review and meta-analysis
Source: PubMed Central journal article supplement — Heart. 2022 Dec 15;109(11):823–31. doi: 10.1136/heartjnl-2022-321885 (PMC10314022; doi:10.1136/heartjnl-2022-321885), 2022-12-15
Supplement: heartjnl-2022-321885supp001.pdf [file heartjnl-2022-321885supp001.pdf]

## Online Supplementary Material

### Table of Contents

|                                                                                                                                                                                     |          |
|-------------------------------------------------------------------------------------------------------------------------------------------------------------------------------------|----------|
| 1. <i>Table S1</i> – PRISMA checklist.....                                                                                                                                          | Page 2-5 |
| 3. <i>Table S2</i> . Revised Cochrane risk-of-bias tool for randomised trials (RoB 2).....                                                                                          | Page 6   |
| 2. <i>Table S3</i> . Pre-recruitment and ongoing randomised studies of IHM-guided care compared to standard care.....                                                               | Page 7   |
| 4. <i>Figure S1</i> . PRISMA flow diagram of source articles for the meta-analysis.....                                                                                             | Page 8   |
| 5. <i>Figure S2</i> . All-cause mortality and total worsening HF events (HF hospitalization and ED and urgent clinic visit for IV HF therapy) in all patients regardless of EF..... | Page 9   |

## Supplementary Appendix, Table S1. PRISMA checklist

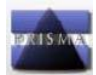

## PRISMA 2020 Checklist

| Section and Topic             | Item # | Checklist item                                                                                                                                                                                                                                                                                       | Location where item is reported |
|-------------------------------|--------|------------------------------------------------------------------------------------------------------------------------------------------------------------------------------------------------------------------------------------------------------------------------------------------------------|---------------------------------|
| <b>TITLE</b>                  |        |                                                                                                                                                                                                                                                                                                      |                                 |
| Title                         | 1      | Identify the report as a systematic review.                                                                                                                                                                                                                                                          | PAGE 1                          |
| <b>ABSTRACT</b>               |        |                                                                                                                                                                                                                                                                                                      |                                 |
| Abstract                      | 2      | See the PRISMA 2020 for Abstracts checklist.                                                                                                                                                                                                                                                         | PAGE 2                          |
| <b>INTRODUCTION</b>           |        |                                                                                                                                                                                                                                                                                                      |                                 |
| Rationale                     | 3      | Describe the rationale for the review in the context of existing knowledge.                                                                                                                                                                                                                          | PAGES 4-5                       |
| Objectives                    | 4      | Provide an explicit statement of the objective(s) or question(s) the review addresses.                                                                                                                                                                                                               | PAGES 4-5                       |
| <b>METHODS</b>                |        |                                                                                                                                                                                                                                                                                                      |                                 |
| Eligibility criteria          | 5      | Specify the inclusion and exclusion criteria for the review and how studies were grouped for the syntheses.                                                                                                                                                                                          | PAGES 5-6                       |
| Information sources           | 6      | Specify all databases, registers, websites, organisations, reference lists and other sources searched or consulted to identify studies. Specify the date when each source was last searched or consulted.                                                                                            | PAGES 5, 8                      |
| Search strategy               | 7      | Present the full search strategies for all databases, registers and websites, including any filters and limits used.                                                                                                                                                                                 | PAGE 5                          |
| Selection process             | 8      | Specify the methods used to decide whether a study met the inclusion criteria of the review, including how many reviewers screened each record and each report retrieved, whether they worked independently, and if applicable, details of automation tools used in the process.                     | PAGES 5-6, 8                    |
| Data collection process       | 9      | Specify the methods used to collect data from reports, including how many reviewers collected data from each report, whether they worked independently, any processes for obtaining or confirming data from study investigators, and if applicable, details of automation tools used in the process. | PAGES 6, 8                      |
| Data items                    | 10a    | List and define all outcomes for which data were sought. Specify whether all results that were compatible with each outcome domain in each study were sought (e.g. for all measures, time points, analyses), and if not, the methods used to decide which results to collect.                        | PAGES 5-6                       |
|                               | 10b    | List and define all other variables for which data were sought (e.g. participant and intervention characteristics, funding sources). Describe any assumptions made about any missing or unclear information.                                                                                         | PAGE 5                          |
| Study risk of bias assessment | 11     | Specify the methods used to assess risk of bias in the included studies, including details of the tool(s) used, how many reviewers assessed each study and whether they worked independently, and if applicable, details of automation tools used in the process.                                    | PAGE 5                          |
| Effect measures               | 12     | Specify for each outcome the effect measure(s) (e.g. risk ratio, mean difference) used in the synthesis or presentation of results.                                                                                                                                                                  | PAGE 6                          |
| Synthesis methods             | 13a    | Describe the processes used to decide which studies were eligible for each synthesis (e.g. tabulating the study intervention characteristics and comparing against the planned groups for each synthesis (item #5)).                                                                                 | PAGE 6-7                        |

| Section and Topic             | Item # | Checklist item                                                                                                                                                                                                                                              | Location where item is reported                               |
|-------------------------------|--------|-------------------------------------------------------------------------------------------------------------------------------------------------------------------------------------------------------------------------------------------------------------|---------------------------------------------------------------|
|                               | 13b    | Describe any methods required to prepare the data for presentation or synthesis, such as handling of missing summary statistics, or data conversions.                                                                                                       | PAGE 6-7                                                      |
|                               | 13c    | Describe any methods used to tabulate or visually display results of individual studies and syntheses.                                                                                                                                                      | PAGE 6-7                                                      |
|                               | 13d    | Describe any methods used to synthesize results and provide a rationale for the choice(s). If meta-analysis was performed, describe the model(s), method(s) to identify the presence and extent of statistical heterogeneity, and software package(s) used. | PAGE 6-7                                                      |
|                               | 13e    | Describe any methods used to explore possible causes of heterogeneity among study results (e.g. subgroup analysis, meta-regression).                                                                                                                        | PAGE 6-7                                                      |
|                               | 13f    | Describe any sensitivity analyses conducted to assess robustness of the synthesized results.                                                                                                                                                                | PAGE 8                                                        |
| Reporting bias assessment     | 14     | Describe any methods used to assess risk of bias due to missing results in a synthesis (arising from reporting biases).                                                                                                                                     | PAGE 5, Supplementary Appendix Figure S2                      |
| Certainty assessment          | 15     | Describe any methods used to assess certainty (or confidence) in the body of evidence for an outcome.                                                                                                                                                       | PAGE 6                                                        |
| <b>RESULTS</b>                |        |                                                                                                                                                                                                                                                             |                                                               |
| Study selection               | 16a    | Describe the results of the search and selection process, from the number of records identified in the search to the number of studies included in the review, ideally using a flow diagram.                                                                | PAGE 8                                                        |
|                               | 16b    | Cite studies that might appear to meet the inclusion criteria, but which were excluded, and explain why they were excluded.                                                                                                                                 | Supplementary Appendix Figure S1                              |
| Study characteristics         | 17     | Cite each included study and present its characteristics.                                                                                                                                                                                                   | PAGES 8-9                                                     |
| Risk of bias in studies       | 18     | Present assessments of risk of bias for each included study.                                                                                                                                                                                                | Supplementary Appendix Table S2, PAGE 14                      |
| Results of individual studies | 19     | For all outcomes, present, for each study: (a) summary statistics for each group (where appropriate) and (b) an effect estimate and its precision (e.g. confidence/credible interval), ideally using structured tables or plots.                            | PAGES 8 – 11, Figures 1 – 6, Supplementary Appendix Figure S2 |
| Results of syntheses          | 20a    | For each synthesis, briefly summarise the characteristics and risk of bias among contributing studies.                                                                                                                                                      | PAGES 11 – 14, Supplementary                                  |

| Section and Topic              | Item # | Checklist item                                                                                                                                                                                                                                                                       | Location where item is reported                             |
|--------------------------------|--------|--------------------------------------------------------------------------------------------------------------------------------------------------------------------------------------------------------------------------------------------------------------------------------------|-------------------------------------------------------------|
|                                |        |                                                                                                                                                                                                                                                                                      | Appendix Table S2                                           |
|                                | 20b    | Present results of all statistical syntheses conducted. If meta-analysis was done, present for each the summary estimate and its precision (e.g. confidence/credible interval) and measures of statistical heterogeneity. If comparing groups, describe the direction of the effect. | PAGES 8 -11                                                 |
|                                | 20c    | Present results of all investigations of possible causes of heterogeneity among study results.                                                                                                                                                                                       | PAGES 11 – 14                                               |
|                                | 20d    | Present results of all sensitivity analyses conducted to assess the robustness of the synthesized results.                                                                                                                                                                           | PAGES 10                                                    |
| Reporting biases               | 21     | Present assessments of risk of bias due to missing results (arising from reporting biases) for each synthesis assessed.                                                                                                                                                              | Supplementary Appendix Table S2                             |
| Certainty of evidence          | 22     | Present assessments of certainty (or confidence) in the body of evidence for each outcome assessed.                                                                                                                                                                                  | PAGES 8 – 11, Figures 1-6, Supplementary Appendix Figure S2 |
| <b>DISCUSSION</b>              |        |                                                                                                                                                                                                                                                                                      |                                                             |
| Discussion                     | 23a    | Provide a general interpretation of the results in the context of other evidence.                                                                                                                                                                                                    | PAGES 11 – 14                                               |
|                                | 23b    | Discuss any limitations of the evidence included in the review.                                                                                                                                                                                                                      | PAGES 13 – 14                                               |
|                                | 23c    | Discuss any limitations of the review processes used.                                                                                                                                                                                                                                | PAGE 14                                                     |
|                                | 23d    | Discuss implications of the results for practice, policy, and future research.                                                                                                                                                                                                       | PAGE 14                                                     |
| <b>OTHER INFORMATION</b>       |        |                                                                                                                                                                                                                                                                                      |                                                             |
| Registration and protocol      | 24a    | Provide registration information for the review, including register name and registration number, or state that the review was not registered.                                                                                                                                       | PAGE 5                                                      |
|                                | 24b    | Indicate where the review protocol can be accessed, or state that a protocol was not prepared.                                                                                                                                                                                       | N/A                                                         |
|                                | 24c    | Describe and explain any amendments to information provided at registration or in the protocol.                                                                                                                                                                                      | N/A                                                         |
| Support                        | 25     | Describe sources of financial or non-financial support for the review, and the role of the funders or sponsors in the review.                                                                                                                                                        | PAGE 15                                                     |
| Competing interests            | 26     | Declare any competing interests of review authors.                                                                                                                                                                                                                                   | PAGE 15                                                     |
| Availability of data, code and | 27     | Report which of the following are publicly available and where they can be found: template data collection forms; data extracted from included studies; data used for all analyses; analytic code; any other materials used in the review.                                           | PAGE 6, 8-9                                                 |

| Section and Topic | Item # | Checklist item | Location where item is reported |
|-------------------|--------|----------------|---------------------------------|
| other materials   |        |                |                                 |

**Supplementary Appendix, Table S2. Revised Cochrane risk-of-bias tool for randomised trials (RoB 2).**

| Domain                                    | COMPASS-HF                                                                        | CHAMPION                                                                          | REDUCE-HF                                                                           | LAPTOP-HF                                                                           | GUIDE-HF                                                                            |
|-------------------------------------------|-----------------------------------------------------------------------------------|-----------------------------------------------------------------------------------|-------------------------------------------------------------------------------------|-------------------------------------------------------------------------------------|-------------------------------------------------------------------------------------|
| 1- Randomisation                          |  |  |  |  |  |
| 2- Deviations from intended interventions |  |  |  |  |  |
| 3- Missing outcome data                   |  |  |  |  |  |
| 4- Outcome measurement                    |  |  |  |  |  |
| 5- Selective reporting                    |  |  |  |  |  |
| Overall                                   |  |  |  |  |  |

-  Low level of concern
-  Some concern
-  High level of concern

**Supplementary Appendix, Table S3. Pre-recruitment and ongoing randomised studies of IHM-guided care compared to standard care**

| Trial                                                                                            | Intervention                                                                                                                                                                                     | Key inclusion criteria                                                                                                                                                                                                                                                 | Design, Country                                                                                                                         | Primary Efficacy Endpoint                                                                                                                   | Target recruitment | Follow-up                                  | Trial Identifier |
|--------------------------------------------------------------------------------------------------|--------------------------------------------------------------------------------------------------------------------------------------------------------------------------------------------------|------------------------------------------------------------------------------------------------------------------------------------------------------------------------------------------------------------------------------------------------------------------------|-----------------------------------------------------------------------------------------------------------------------------------------|---------------------------------------------------------------------------------------------------------------------------------------------|--------------------|--------------------------------------------|------------------|
| <b>SELFIe-HF</b>                                                                                 | Standard HF care plus CardioMEMS™ Vs standard HF care (no implant)                                                                                                                               | NYHA: II - ambulatory IV<br>EF: all ranges<br>HFH: <12 months<br>NT-proBNP: >800pg/ml<br>Minimum technological knowledge                                                                                                                                               | Single-centre, prospective, randomised, open-label blinded-endpoint trial.<br><br>Canada                                                | Composite outcome: first occurrence of HF hospitalization or ED or urgent outpatient clinic visit for IV HF therapy or cardiovascular death | 150                | 12 months                                  | NCT04441203      |
| <b>HALO-Shock</b>                                                                                | Standard HF care plus CardioMEMS™ Vs standard HF care (no implant)                                                                                                                               | NYHA: III<br>EF: all ranges<br>HFH: Current admission with cardiogenic shock<br>Natriuretic peptide: No<br>Access to internet                                                                                                                                          | Pilot, prospective randomised unblinded pragmatic trial<br><br>USA                                                                      | All-cause death, LVAD, cardiac transplantation), CV hospitalization, change in MLHFQ score, and change in NT-proBNP                         | 40                 | 6 months                                   | NCT04419480      |
| <b>TARGET-LOAD</b>                                                                               | LVAD plus Standard HF care plus CardioMEMS™ Vs LVAD plus standard HF care                                                                                                                        | Refractory HF requiring LVAD<br>EF: ≤25%<br>Aetiology: Non-ischaeamic<br>HF duration: <5 years<br>BMI: ≤35kg/m <sup>2</sup>                                                                                                                                            | Prospective, randomised-controlled, non-blinded multi-centre pilot trial<br><br>USA                                                     | Proportion of subjects meeting LVAD explantation criteria                                                                                   | 10                 | 24 months post-LVAD                        | NCT04977310      |
| <b>Pulmonary Artery Sensor System Pressure Monitoring to Improve Heart Failure (HF) Outcomes</b> | Standard HF care plus CardioMEMS™ Vs standard HF care (no implant)                                                                                                                               | NYHA: III<br>HFH: <12 months<br>EF: All ranges (on OMT if EF≤40%)                                                                                                                                                                                                      | Prospective, randomised, open-label, multi-centre trial<br><br>Germany                                                                  | Efficacy: HFH or all-cause death<br><br>Safety:<br>(i) Rate of device / system related complications<br>(ii) Rate of sensor failures        | 554                | 12 months                                  | NCT04398654      |
| <b>TAP-CHF</b>                                                                                   | PHASE 1: AF catheter ablation Vs anti-arrhythmic drug strategy<br><br>PHASE 2: Optimized rhythm control plus CardioMEMS™ -guided Vs optimized rhythm control without CardioMEMS™ -guided HF care | EF: ≥45% ± structural changes<br>HFH: <12 months<br>AF related hospitalization: <12 months<br>AF: paroxysmal or persistent<br>NT-proBNP: >200pg/ml in sinus or >600pg/ml in AF if hospitalized<br>NT-proBNP: >300pg/ml in sinus or >900pg/ml in AF if not hospitalized | Prospective, pilot study utilizing a randomised comparative sequential evaluation of two therapies in two consecutive phases<br><br>USA | Time to first HF hospitalization or CV death                                                                                                | 360                | PHASE 1: 9 months<br><br>PHASE 2: 9 months | NCT04160000      |

AF = atrial fibrillation; BMI = body mass index; CV = cardiovascular; ED = emergency department; EF = ejection fraction; HF = heart failure; HFH = heart failure hospitalization; IV = intravenous; LVAD = left ventricular assist device; MLHFQ = Minnesota Living with Heart Failure Questionnaire; NT-proBNP = N-terminal pro-B type natriuretic peptide; NYHA = New York Heart Association; OMT = optimal medical therapy; USA = United States of America

Supplementary Appendix, Figure S1. PRISMA flow diagram of source articles for the meta-analysis

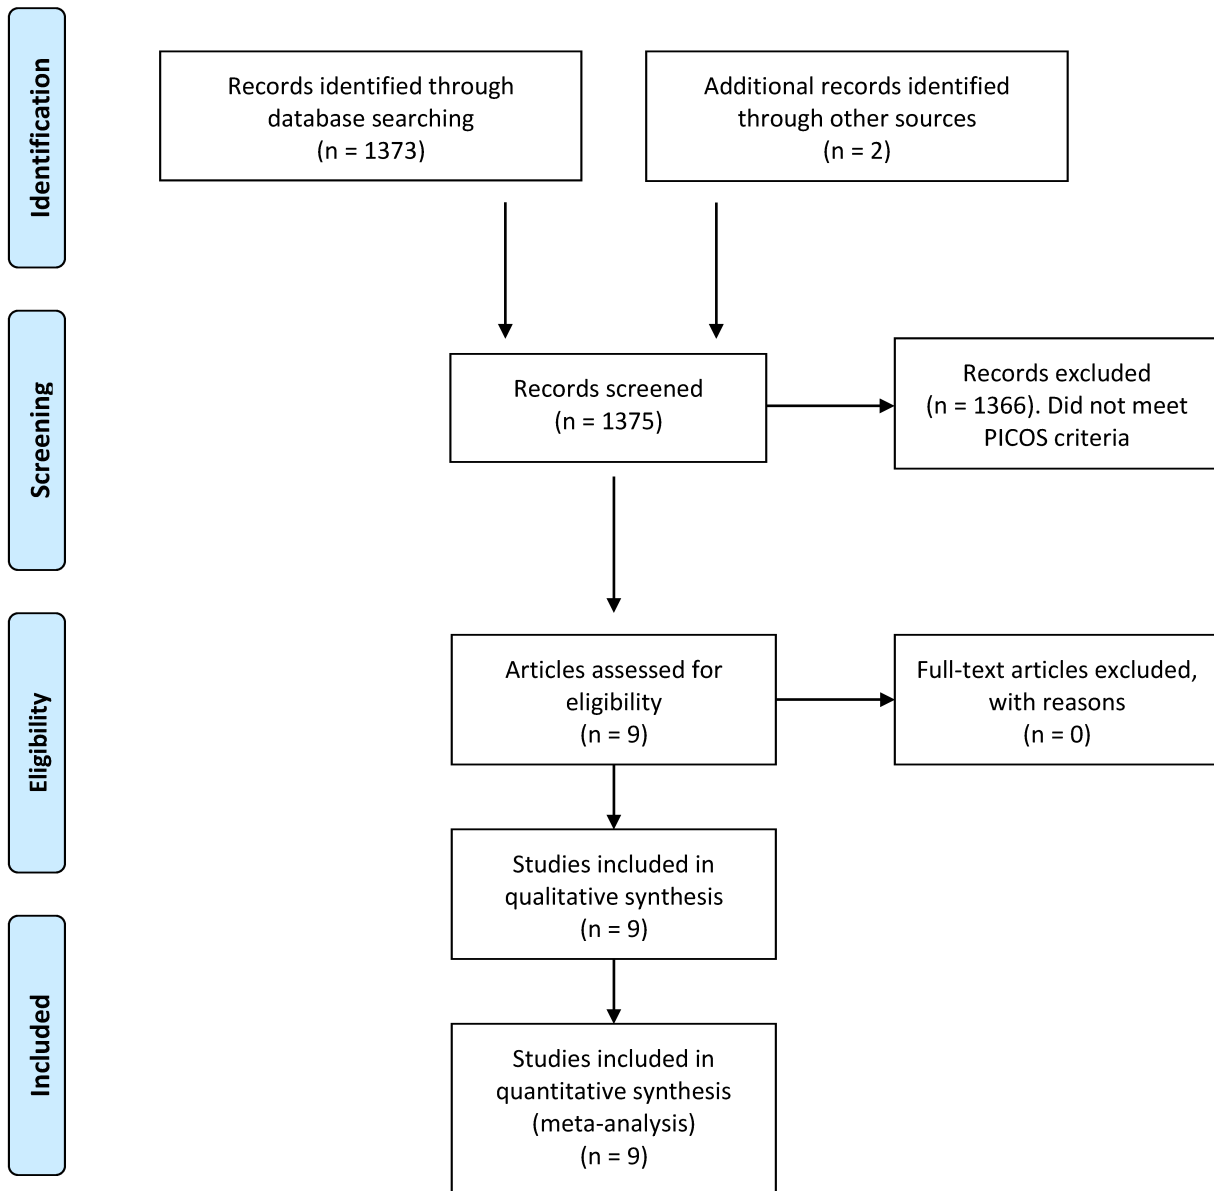



**Supplementary Appendix, Figure S2. All-cause mortality and total worsening HF events (HF hospitalization and ED and urgent clinic visit for IV HF therapy) in all patients regardless of EF**

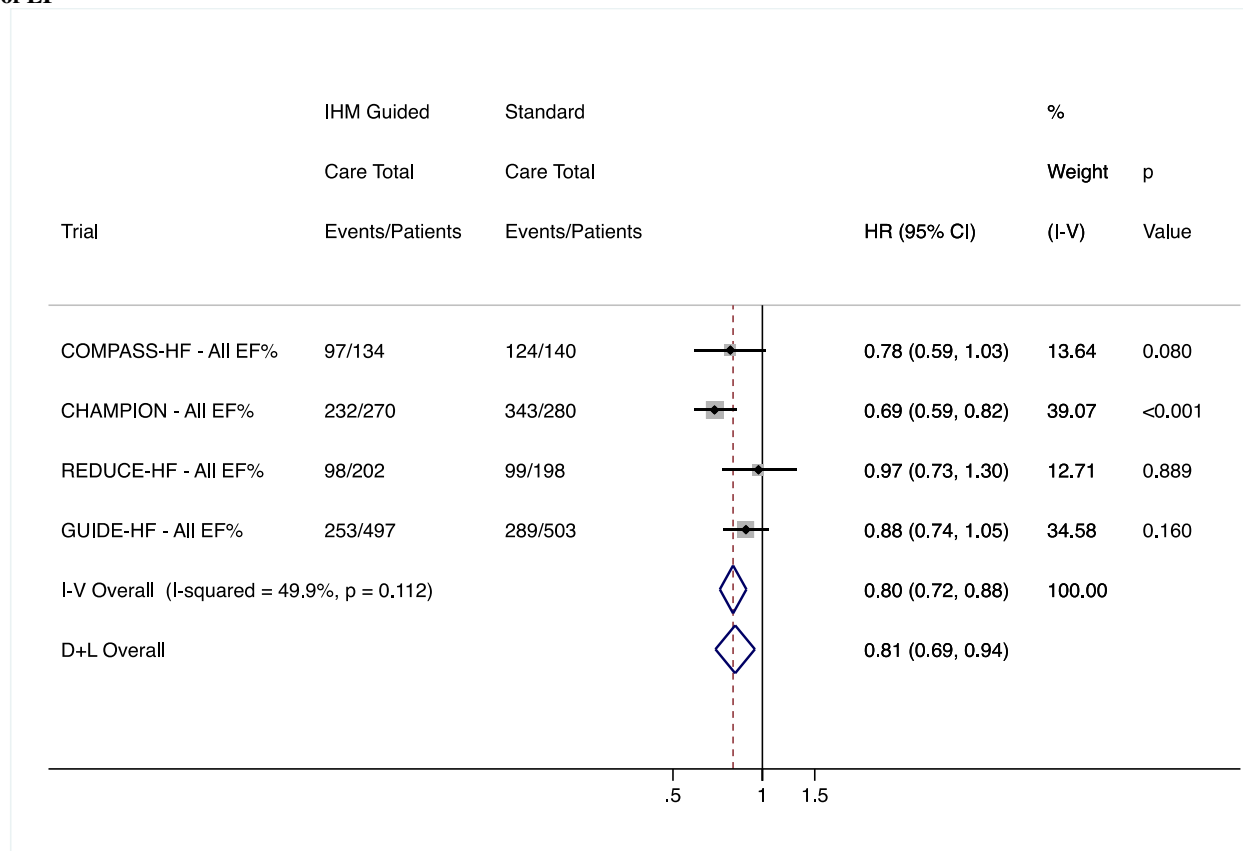

D+L = DerSimonian & Laird, ED = emergency department, EF = ejection fraction, HF = heart failure, HR = hazard ratio, IHM = implantable haemodynamic monitor, IRR = incidence rate ratio, IV = intravenous, I-V = inverse-variance

\*Recurrent event effect estimates include HRs for CHAMPION and GUIDE-HF and IRR for COMPASS-HF and REDUCE-HF
